# Supplementary material
Source: PubMed Central journal article supplement (PMC8105736)
Supplement: mmc1.pdf [file mmc1.pdf]

**Biophysical Journal, Volume 120**

**Supplemental information**

**Mechanistic link between CaM-RyR2 interactions and the genesis of cardiac arrhythmia**

**D'Artagnan Greene and Yohannes Shiferaw**

## Online Supplement

### The role of the second closed state $C_2$

The computational approach developed in this study can be used to explore how the Markov state scheme for an RyR2 subunit determines macroscopic Ca cycling behavior. In this section we will evaluate specifically how the presence of the second closed state  $C_2$  determines the time course of a Ca spark, the waiting time to a spontaneous Ca spark, and the Ca wave propagation velocity. To accomplish this we will consider a model in which the  $C_2$  state is eliminated, so that the RyR2 subunit transitions between  $C_1$  and  $O$  in Eq. 13. In Figure S1A we compute the full RyR2 open probability as a function of  $[Ca]$  in the absence of the state  $C_2$ . Here, we find that eliminating  $C_2$  induces a leftward shift of the RyR2 open probability  $P_o$ , along with an increase in the plateau open probability for large  $[Ca]$ . This increase in  $P_o$  is a direct consequence of the fact that at high  $[Ca]$  the RyR2 subunit must reside in the open state. Thus, the half maximum of the  $P_o$  will occur at a smaller  $[Ca]$  and the open probability at high  $[Ca]$  approaches  $P_o = 1$ . This is in contrast to the model considered in Eq. 13 where  $P_o < 1$  since the subunit can transition to the state  $C_2$  at high  $[Ca]$ . To evaluate the effect of this change on the macroscopic behavior of the system we have also computed the time course of a Ca spark (Figure S1B), the mean time to a spontaneous Ca spark  $\langle T_{spont} \rangle$  (Figure S1C), and finally the Ca wave speed  $V_{wave}$  (Figure S1D). Our numerical simulations show that the time course of a Ca spark is only modestly dependent on the presence of the  $C_2$  state. In particular, we find that eliminating  $C_2$  increases the amount of Ca released during a Ca spark by a modest 10%. We have also computed the mean time to a spontaneous Ca spark  $\langle T_{spont} \rangle$  and found that removing  $C_2$  decreases the mean open time. This effect increases with  $[CaM]$  and we find almost a 20% reduction of  $\langle T_{spont} \rangle$  at  $[CaM] = 0.4\mu M$ . Thus, as  $[CaM]$  is increased the effect of the  $C_2$  state becomes more pronounced. Also, our simulations reveal that the dependence of the Ca wave speed on the SR load is highly dependent on the presence of the  $C_2$  state. In particular we find that removing  $C_2$  decreases the threshold for Ca wave propagation and increases the Ca wave speed by roughly 30% (Figure S1D). These simulation results indicate that removing the state  $C_2$  effectively increases the excitability of an RyR2 cluster but has little effect on the time course of a Ca spark once it is triggered.

### The dependence of RyR2 open probability on SR load

To complete our computational model of RyR2 we have also computed the dependence of the RyR2 open probability on the JSR load  $[Ca]_{jsr}$ . In Figure S2 we plot  $P_o$  vs  $[Ca]_{jsr}$  for diastolic Ca levels  $[Ca]_i = 2\mu M$  (black line),  $[Ca]_i = 5\mu M$  (red line), and  $[Ca]_i = 10\mu M$  (blue line).

Figure S1

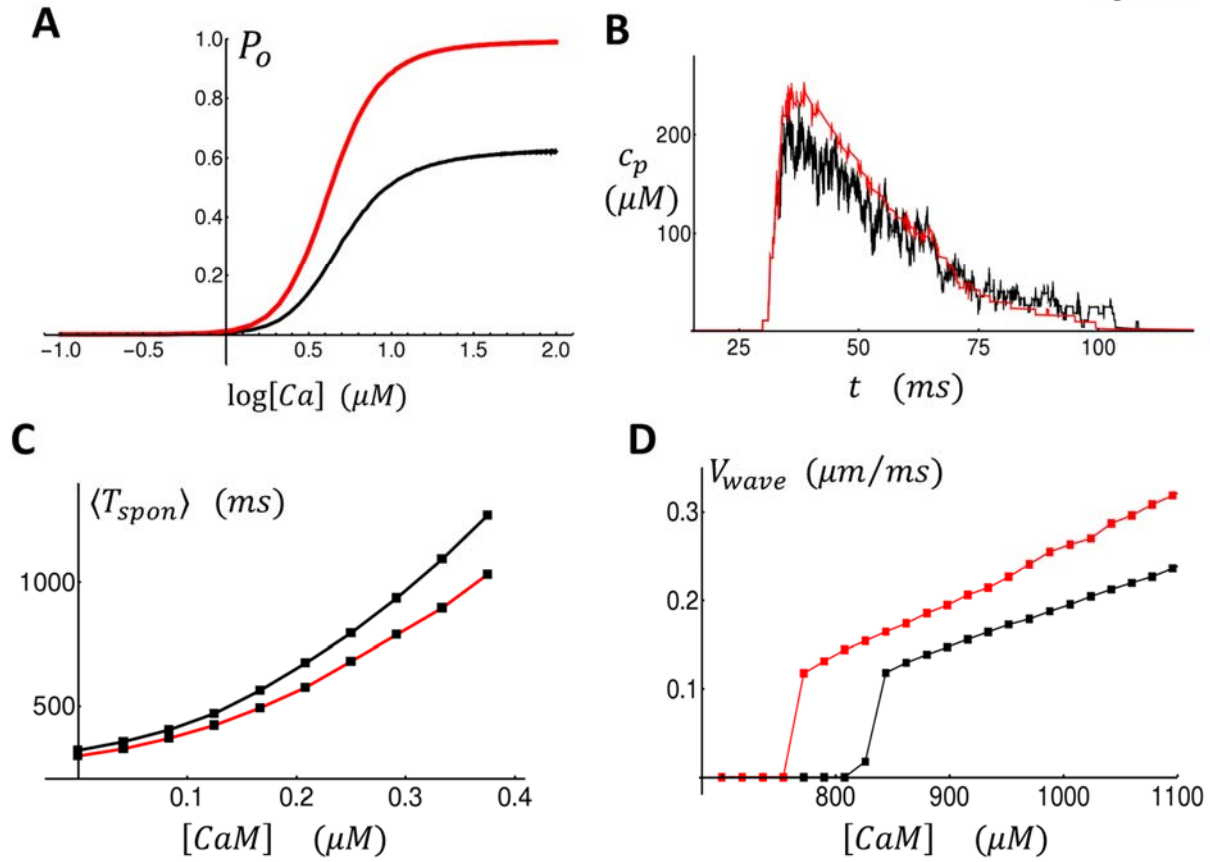

**Figure S1.** Model properties in the presence (black) and absence (red) of the state state  $C_2$ . (A) RyR2 open probability. In this simulation the Calmodulin concentration is fixed at  $[CaM] = 0.2\mu M$ . (B) Dyadic junction Ca concentration  $c_p$  as a function of time. The initial NSR load is set at  $c_{nsr} = 1000\mu M$ . (C)  $\langle T_{spon} \rangle$  vs  $[CaM]$ . (D) The Ca wave velocity  $V_{wave}$  as a function of the network SR load  $c_{nsr}$ .

Figure S2

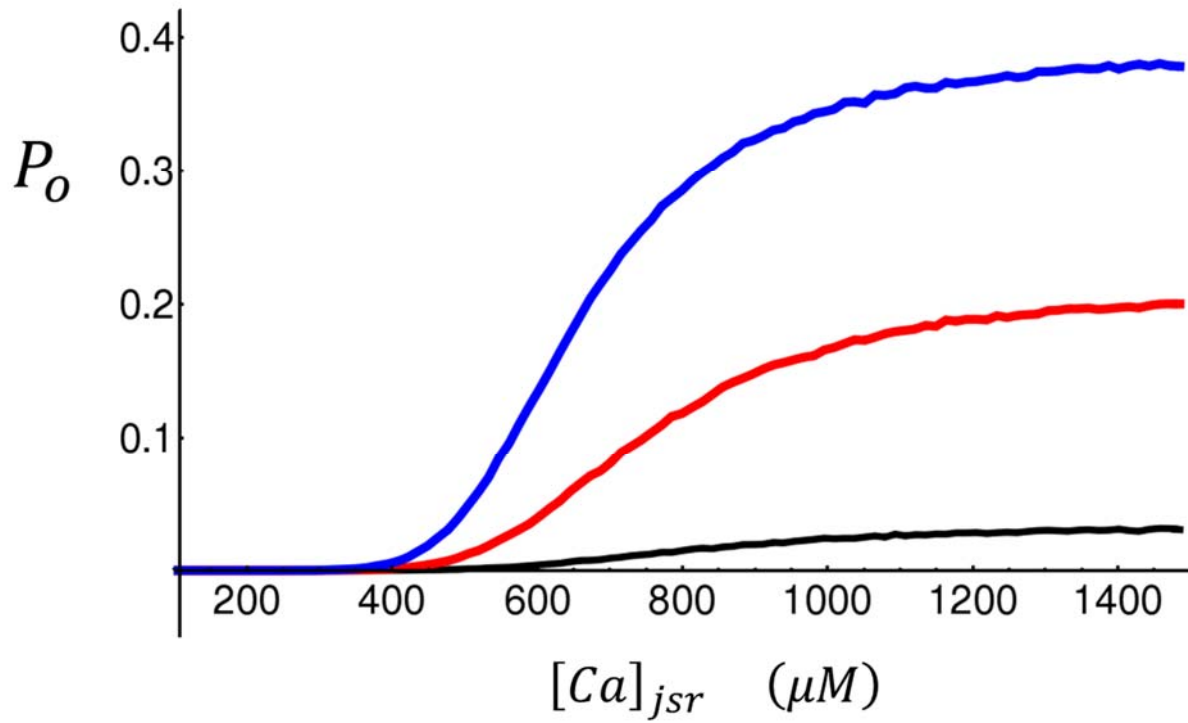

**Figure S2.**  $P_o$  vs  $[Ca]_{jsr}$  for diastolic Ca levels  $[Ca]_i = 2 \mu M$  (black line),  $[Ca]_i = 5 \mu M$  (red line), and  $[Ca]_i = 10 \mu M$  (blue line). For all simulations we have fixed  $[CaM] = 0.5 \mu M$ .
